# Supplementary material for: Socioeconomic inequality in the prevalence of noncommunicable diseases in low- and middle-income countries: Results from the World Health Survey
Source: PubMed Central journal article supplement (PMC3490890; doi:10.1186/1471-2458-12-474), 2012-06-22
Supplement: 1471-2458-12-474-S2.pdf [file 1471-2458-12-474-S2.pdf]

Additional file 2: Study sample size, by country and sex, World Health Survey 2002-04

|                                  | Sample size   |               |               |
|----------------------------------|---------------|---------------|---------------|
|                                  | Total         | Men           | Women         |
| <b>Middle-income countries</b>   | <b>83,063</b> | <b>36,558</b> | <b>46,505</b> |
| Bosnia and Herzegovina           | 1,028         | 434           | 594           |
| China                            | 3,993         | 1,954         | 2,039         |
| Croatia                          | 990           | 401           | 589           |
| Czech Republic                   | 935           | 419           | 516           |
| Dominican Republic               | 4,534         | 2,104         | 2,430         |
| Ecuador                          | 4,608         | 2,043         | 2,565         |
| Estonia                          | 1,011         | 367           | 644           |
| Georgia                          | 2,749         | 1,162         | 1,587         |
| Kazakhstan                       | 4,496         | 1,544         | 2,952         |
| Latvia                           | 855           | 286           | 569           |
| Malaysia                         | 6,038         | 2,671         | 3,367         |
| Mauritius                        | 3,888         | 1,872         | 2,016         |
| Morocco                          | 4,472         | 2,074         | 2,398         |
| Namibia                          | 4,246         | 1,722         | 2,524         |
| Paraguay                         | 5,131         | 2,348         | 2,783         |
| Philippines                      | 10,075        | 4,659         | 5,416         |
| Russian Federation               | 4,422         | 1,593         | 2,829         |
| South Africa                     | 2,351         | 1,115         | 1,236         |
| Sri Lanka                        | 6,698         | 3,117         | 3,581         |
| Tunisia                          | 5,068         | 2,343         | 2,725         |
| Ukraine                          | 2,498         | 883           | 1,615         |
| Uruguay                          | 2,977         | 1,447         | 1,530         |
| <b>Low-income countries</b>      | <b>87,235</b> | <b>40,959</b> | <b>46,276</b> |
| Bangladesh                       | 5,550         | 2,584         | 2,966         |
| Burkina Faso                     | 4,821         | 2,271         | 2,550         |
| Chad                             | 4,635         | 2,191         | 2,444         |
| Comoros                          | 1,758         | 786           | 972           |
| Cote d'Ivoire                    | 3,178         | 1,815         | 1,363         |
| Ethiopia                         | 4,936         | 2,390         | 2,546         |
| Ghana                            | 3,931         | 1,772         | 2,159         |
| India                            | 9,723         | 4,705         | 5,018         |
| Kenya                            | 4,346         | 1,847         | 2,499         |
| Lao People's Democratic Republic | 4,888         | 2,295         | 2,593         |
| Malawi                           | 5,297         | 2,210         | 3,087         |
| Mali                             | 4,145         | 2,382         | 1,763         |
| Mauritania                       | 3,705         | 1,440         | 2,265         |
| Myanmar                          | 5,886         | 2,551         | 3,335         |

|          |       |       |       |
|----------|-------|-------|-------|
| Pakistan | 6,104 | 3,402 | 2,702 |
| Senegal  | 2,970 | 1,548 | 1,422 |
| Viet Nam | 3,491 | 1,571 | 1,920 |
| Zambia   | 3,810 | 1,722 | 2,088 |
| Zimbabwe | 4,061 | 1,477 | 2,584 |
