# Supplementary material for: Socioeconomic inequality in the prevalence of noncommunicable diseases in low- and middle-income countries: Results from the World Health Survey
Source: PubMed Central journal article supplement (PMC3490890; doi:10.1186/1471-2458-12-474), 2012-06-22
Supplement: 1471-2458-12-474-S3.pdf [file 1471-2458-12-474-S3.pdf]

Additional file 3: Noncommunicable diseases non-response rates, by country and sex, World Health Survey 2002-04

|                         | Non-response rate (%) |           |        |            |          |        |           |        |            |          |
|-------------------------|-----------------------|-----------|--------|------------|----------|--------|-----------|--------|------------|----------|
|                         | Men                   |           |        |            |          | Women  |           |        |            |          |
|                         | Angina                | Arthritis | Asthma | Depression | Diabetes | Angina | Arthritis | Asthma | Depression | Diabetes |
| Middle-income countries | 7                     | 3         | 2      | 8          | 2        | 8      | 3         | 2      | 9          | 2        |
| Low-income countries    | 8                     | 4         | 3      | 7          | 3        | 10     | 3         | 3      | 7          | 3        |
