# Supplementary material for: Socioeconomic inequality in the prevalence of noncommunicable diseases in low- and middle-income countries: Results from the World Health Survey
Source: PubMed Central journal article supplement (PMC3490890; doi:10.1186/1471-2458-12-474), 2012-06-22
Supplement: 1471-2458-12-474-S5.pdf [file 1471-2458-12-474-S5.pdf]

Additional file 5: Wealth-related relative inequality in noncommunicable disease prevalence among adults aged 18 or higher living in 41 low- and middle-income countries, World Health Survey 2002-04

|                     |         | Men                 |       |      |                  |       |      | Women               |       |      |                  |       |      |
|---------------------|---------|---------------------|-------|------|------------------|-------|------|---------------------|-------|------|------------------|-------|------|
|                     |         | Middle-income group |       |      | Low-income group |       |      | Middle-income group |       |      | Low-income group |       |      |
|                     |         | Estimate            | 95%CI |      | Estimate         | 95%CI |      | Estimate            | 95%CI |      | Estimate         | 95%CI |      |
| <b>Angina</b>       | Model 1 | 1.90                | 1.56  | 2.32 | 2.23             | 1.81  | 2.74 | 1.77                | 1.47  | 2.13 | 1.57             | 1.32  | 1.87 |
|                     | Model 2 | 1.76                | 1.39  | 2.23 | 1.68             | 1.32  | 2.14 | 1.75                | 1.42  | 2.17 | 1.37             | 1.07  | 1.76 |
| <b>Arthritis</b>    | Model 1 | 1.37                | 1.03  | 1.82 | 1.60             | 1.17  | 2.20 | 1.09                | 0.87  | 1.38 | 1.31             | 1.05  | 1.64 |
|                     | Model 1 | 1.22                | 0.88  | 1.70 | 1.14             | 0.81  | 1.61 | 1.12                | 0.84  | 1.48 | 1.15             | 0.86  | 1.55 |
| <b>Asthma</b>       | Model 2 | 2.10                | 1.61  | 2.73 | 2.05             | 1.63  | 2.58 | 1.79                | 1.19  | 2.68 | 1.21             | 0.94  | 1.57 |
|                     | Model 1 | 1.56                | 1.15  | 2.10 | 1.57             | 1.12  | 2.19 | 1.69                | 1.08  | 2.62 | 1.08             | 0.80  | 1.47 |
| <b>Depression</b>   | Model 1 | 1.87                | 1.33  | 2.63 | 1.61             | 1.14  | 2.26 | 1.75                | 1.34  | 2.29 | 1.63             | 1.31  | 2.04 |
|                     | Model 2 | 2.08                | 1.31  | 3.31 | 1.47             | 1.02  | 2.12 | 1.72                | 1.22  | 2.42 | 1.24             | 0.92  | 1.66 |
| <b>Diabetes</b>     | Model 1 | 0.57                | 0.38  | 0.84 | 0.18             | 0.11  | 0.30 | 0.64                | 0.38  | 1.06 | 0.14             | 0.08  | 0.25 |
|                     | Model 2 | 0.76                | 0.47  | 1.23 | 0.45             | 0.23  | 0.90 | 0.60                | 0.33  | 1.10 | 0.24             | 0.14  | 0.44 |
| <b>Co-morbidity</b> | Model 1 | 1.90                | 1.44  | 2.53 | 2.50             | 1.89  | 3.30 | 1.51                | 1.14  | 1.98 | 1.46             | 1.19  | 1.80 |
|                     | Model 2 | 1.65                | 1.16  | 2.34 | 1.91             | 1.33  | 2.74 | 1.45                | 1.05  | 1.99 | 1.16             | 0.89  | 1.50 |

\* Model 1 is adjusted for country of residence and age

\*\* Model 2 is adjusted for country of residence, age, marital status, urban/rural area and education
