# Supplementary material for: Socioeconomic inequality in the prevalence of noncommunicable diseases in low- and middle-income countries: Results from the World Health Survey
Source: PubMed Central journal article supplement (PMC3490890; doi:10.1186/1471-2458-12-474), 2012-06-22
Supplement: 1471-2458-12-474-S6.pdf [file 1471-2458-12-474-S6.pdf]

Additional file 6: Crude prevalence (%) of non-communicable diseases among adults aged 18 or higher living in 41 low- and middle-income countries, by wealth, World Health Survey 2002-04

|       |                     |                   | Angina   |           |      | Arthritis |        |           | Asthma   |          |     | Depression |        |           | Diabetes |        |          | Co-morbidity |  |  |
|-------|---------------------|-------------------|----------|-----------|------|-----------|--------|-----------|----------|----------|-----|------------|--------|-----------|----------|--------|----------|--------------|--|--|
|       |                     |                   | Estimate | 95% CI    |      | Estimate  | 95% CI |           | Estimate | 95% CI   |     | Estimate   | 95% CI |           | Estimate | 95% CI | Estimate | 95% CI       |  |  |
| Men   | Middle-income group | Wealth quintile 1 | 7.4      | 6.5 8.2   | 9.0  | 7.5 10.5  | 10.4   | 8.6 12.1  | 5.3      | 4.2 6.4  | 3.0 | 2.0 4.0    | 10.2   | 8.4 12.0  |          |        |          |              |  |  |
|       |                     | Wealth quintile 2 | 7.2      | 6.4 8.0   | 8.5  | 7.2 9.8   | 8.0    | 6.6 9.4   | 3.8      | 2.8 4.9  | 2.5 | 1.7 3.3    | 8.1    | 6.8 9.5   |          |        |          |              |  |  |
|       |                     | Wealth quintile 3 | 7.1      | 6.3 7.8   | 8.3  | 6.9 9.7   | 8.2    | 6.8 9.5   | 4.5      | 3.4 5.6  | 2.8 | 2.1 3.6    | 7.7    | 6.3 9.0   |          |        |          |              |  |  |
|       |                     | Wealth quintile 4 | 7.4      | 6.6 8.2   | 7.7  | 6.5 8.8   | 6.9    | 5.8 8.1   | 4.1      | 3.2 5.0  | 3.0 | 2.3 3.6    | 6.9    | 5.7 8.0   |          |        |          |              |  |  |
|       |                     | Wealth quintile 5 | 5.4      | 4.7 6.2   | 5.4  | 4.0 6.8   | 4.4    | 3.5 5.3   | 2.3      | 1.6 3.0  | 3.3 | 2.7 4.0    | 4.0    | 3.0 5.0   |          |        |          |              |  |  |
|       | Low-income group    | Wealth quintile 1 | 13.0     | 11.4 14.6 | 5.2  | 4.0 6.4   | 7.7    | 6.6 8.7   | 6.3      | 5.3 7.4  | 0.8 | 0.5 1.1    | 7.6    | 6.3 8.9   |          |        |          |              |  |  |
|       |                     | Wealth quintile 2 | 12.0     | 10.6 13.5 | 6.2  | 5.1 7.4   | 6.7    | 5.6 7.8   | 5.8      | 4.8 6.8  | 1.4 | 0.9 1.9    | 7.2    | 6.1 8.2   |          |        |          |              |  |  |
|       |                     | Wealth quintile 3 | 10.5     | 9.0 12.0  | 4.9  | 3.9 5.9   | 5.9    | 4.8 7.1   | 5.3      | 4.3 6.4  | 1.8 | 1.1 2.4    | 5.8    | 4.7 6.8   |          |        |          |              |  |  |
|       |                     | Wealth quintile 4 | 8.4      | 7.0 9.7   | 4.1  | 3.3 4.9   | 5.0    | 4.2 5.9   | 5.6      | 3.5 7.6  | 1.8 | 1.2 2.3    | 4.2    | 3.4 5.1   |          |        |          |              |  |  |
|       |                     | Wealth quintile 5 | 6.1      | 5.1 7.1   | 3.7  | 2.8 4.5   | 3.7    | 3.1 4.3   | 3.5      | 2.8 4.2  | 3.4 | 2.7 4.2    | 3.3    | 2.6 3.9   |          |        |          |              |  |  |
| Women | Middle-income group | Wealth quintile 1 | 26.9     | 24.3 29.5 | 12.0 | 10.3 13.6 | 12.0   | 10.6 13.4 | 9.4      | 7.9 11.0 | 5.7 | 4.6 6.8    | 16.1   | 14.3 17.9 |          |        |          |              |  |  |
|       |                     | Wealth quintile 2 | 22.9     | 20.7 25.0 | 13.0 | 11.3 14.8 | 9.7    | 8.5 11.0  | 6.9      | 5.6 8.2  | 4.7 | 3.8 5.7    | 14.4   | 12.6 16.3 |          |        |          |              |  |  |
|       |                     | Wealth quintile 3 | 17.8     | 16.0 19.5 | 10.8 | 9.5 12.1  | 9.2    | 7.6 10.9  | 6.9      | 5.6 8.3  | 3.8 | 3.0 4.6    | 11.1   | 9.7 12.6  |          |        |          |              |  |  |
|       |                     | Wealth quintile 4 | 15.6     | 13.7 17.5 | 10.1 | 8.7 11.5  | 6.0    | 4.7 7.3   | 6.7      | 5.4 8.0  | 4.9 | 3.9 5.8    | 10.2   | 8.5 11.9  |          |        |          |              |  |  |
|       |                     | Wealth quintile 5 | 12.6     | 10.5 14.6 | 9.4  | 7.9 10.9  | 6.7    | 4.6 8.8   | 4.0      | 3.2 4.7  | 5.0 | 3.2 6.8    | 8.1    | 6.1 10.1  |          |        |          |              |  |  |
|       | Low-income group    | Wealth quintile 1 | 18.6     | 16.6 20.6 | 8.0  | 6.5 9.4   | 5.9    | 4.8 7.0   | 10.3     | 8.7 11.9 | 0.8 | 0.4 1.2    | 9.3    | 8.0 10.7  |          |        |          |              |  |  |
|       |                     | Wealth quintile 2 | 17.4     | 15.8 19.0 | 7.7  | 6.6 8.8   | 6.6    | 5.6 7.6   | 9.2      | 7.9 10.5 | 1.6 | 0.9 2.2    | 9.3    | 8.1 10.6  |          |        |          |              |  |  |
|       |                     | Wealth quintile 3 | 15.4     | 13.9 16.9 | 8.4  | 7.1 9.6   | 5.9    | 4.9 7.0   | 9.7      | 8.2 11.3 | 1.4 | 0.9 1.8    | 8.2    | 7.1 9.3   |          |        |          |              |  |  |
|       |                     | Wealth quintile 4 | 13.7     | 11.9 15.5 | 6.8  | 5.7 7.9   | 5.4    | 4.5 6.3   | 8.7      | 7.5 9.9  | 2.8 | 1.9 3.7    | 7.7    | 6.6 8.9   |          |        |          |              |  |  |
|       |                     | Wealth quintile 5 | 12.6     | 11.0 14.3 | 5.7  | 4.8 6.6   | 4.9    | 4.0 5.7   | 5.3      | 4.3 6.2  | 3.4 | 2.6 4.2    | 6.1    | 5.0 7.2   |          |        |          |              |  |  |
