# Supplementary material for: Socioeconomic inequality in the prevalence of noncommunicable diseases in low- and middle-income countries: Results from the World Health Survey
Source: PubMed Central journal article supplement (PMC3490890; doi:10.1186/1471-2458-12-474), 2012-06-22
Supplement: 1471-2458-12-474-S7.pdf [file 1471-2458-12-474-S7.pdf]

Additional file 7: Education-related relative inequality in noncommunicable disease prevalence among adults aged 18 or higher living in 41 low- and middle-income countries, World Health Survey 2002-04

|                     |         | Men                 |       |      |                  |       |      | Women               |       |      |                  |       |      |
|---------------------|---------|---------------------|-------|------|------------------|-------|------|---------------------|-------|------|------------------|-------|------|
|                     |         | Middle-income group |       |      | Low-income group |       |      | Middle-income group |       |      | Low-income group |       |      |
|                     |         | Estimate            | 95%CI |      | Estimate         | 95%CI |      | Estimate            | 95%CI |      | Estimate         | 95%CI |      |
| <b>Angina</b>       | Model 1 | 1.52                | 1.19  | 1.93 | 2.20             | 1.70  | 2.86 | 1.35                | 1.10  | 1.64 | 1.66             | 1.35  | 2.06 |
|                     | Model 2 | 1.09                | 0.83  | 1.42 | 1.54             | 1.14  | 2.06 | 1.05                | 0.87  | 1.28 | 1.29             | 1.01  | 1.63 |
| <b>Arthritis</b>    | Model 1 | 1.20                | 0.88  | 1.63 | 1.86             | 1.24  | 2.80 | 1.00                | 0.79  | 1.27 | 1.43             | 1.02  | 2.00 |
|                     | Model 1 | 0.97                | 0.68  | 1.39 | 1.60             | 1.03  | 2.50 | 0.94                | 0.73  | 1.20 | 1.18             | 0.79  | 1.75 |
| <b>Asthma</b>       | Model 2 | 2.04                | 1.47  | 2.85 | 2.08             | 1.52  | 2.86 | 1.74                | 1.12  | 2.69 | 1.39             | 0.98  | 1.98 |
|                     | Model 1 | 1.41                | 0.99  | 2.02 | 1.54             | 1.02  | 2.31 | 1.41                | 0.95  | 2.08 | 1.26             | 0.87  | 1.82 |
| <b>Depression</b>   | Model 1 | 1.51                | 0.96  | 2.38 | 1.45             | 0.91  | 2.29 | 1.58                | 1.07  | 2.33 | 2.19             | 1.68  | 2.87 |
|                     | Model 2 | 1.12                | 0.65  | 1.93 | 1.06             | 0.63  | 1.77 | 1.23                | 0.81  | 1.87 | 1.71             | 1.22  | 2.39 |
| <b>Diabetes</b>     | Model 1 | 0.70                | 0.45  | 1.08 | 0.18             | 0.12  | 0.29 | 1.07                | 0.66  | 1.72 | 0.17             | 0.10  | 0.31 |
|                     | Model 2 | 0.98                | 0.60  | 1.61 | 0.36             | 0.20  | 0.64 | 1.44                | 0.96  | 2.17 | 0.44             | 0.22  | 0.88 |
| <b>Co-morbidity</b> | Model 1 | 1.56                | 1.10  | 2.20 | 2.46             | 1.78  | 3.41 | 1.39                | 1.04  | 1.87 | 1.97             | 1.44  | 2.71 |
|                     | Model 2 | 1.09                | 0.74  | 1.61 | 1.66             | 1.12  | 2.45 | 1.18                | 0.90  | 1.54 | 1.64             | 1.13  | 2.39 |

\* Model 1 is adjusted for country of residence and age

\*\* Model 2 is adjusted for country of residence, age, marital status, urban/rural area and wealth
